# Supplementary material
Source: publisher figshare collection journal article supplement (https://acs.figshare.com/ndownloader/files/21754560)

## SUPPLEMENTARY INFORMATION

### **Characterization of Key Aroma Compounds in Raw and Roasted Peas (*Pisum sativum* L.) by Application of Instrumental and Sensory Techniques**

Shuang Bi<sup>a,b,c,d</sup>, Xinxing Xu<sup>a,b,c,d</sup>, Dongsheng Luo<sup>a,b,c,d</sup>, Fei Lao<sup>a,b,c,d</sup>, Xueli Pang<sup>e</sup>, Qun Shen<sup>a,b,c,d</sup>,  
Xiaosong Hu<sup>a,b,c,d</sup>, Jihong Wu<sup>a,b,c,d\*</sup>

<sup>a</sup> College of Food Science and Nutritional Engineering, China Agricultural University, Beijing 100083, China

<sup>b</sup> National Engineering Research Center for Fruit & Vegetable Processing, Beijing 100083, China

<sup>c</sup> Key Laboratory of Fruit & Vegetable Processing, Ministry of Agriculture, Beijing 100083, China

<sup>d</sup> Beijing Key Laboratory for Food Non-thermal Processing, Beijing 100083, China

<sup>e</sup> Laboratory of Tobacco and Aromatic Plants Quality and Safety Risk Assessment, Ministry of Agriculture and Rural Affairs, Tobacco Research Institute of Chinese Academy of Agricultural Sciences, Qingdao 266001, China

**\*Corresponding authors.**

E-mail address: [wjhcau@hotmail.com](mailto:wjhcau@hotmail.com) (Jihong Wu); Tel.: +86-13581761613; Full postal address: No.17 Qinghua East Road, Haidian District, Beijing 100083, China

## **SUPPLEMENTARY FIGURE CAPTIONS**

**Supplemental Figure 1** Effect of extraction time (a), extraction temperature (b) and sample weight (c) on the area and number of total volatiles of pea.

Supplemental Figure 1

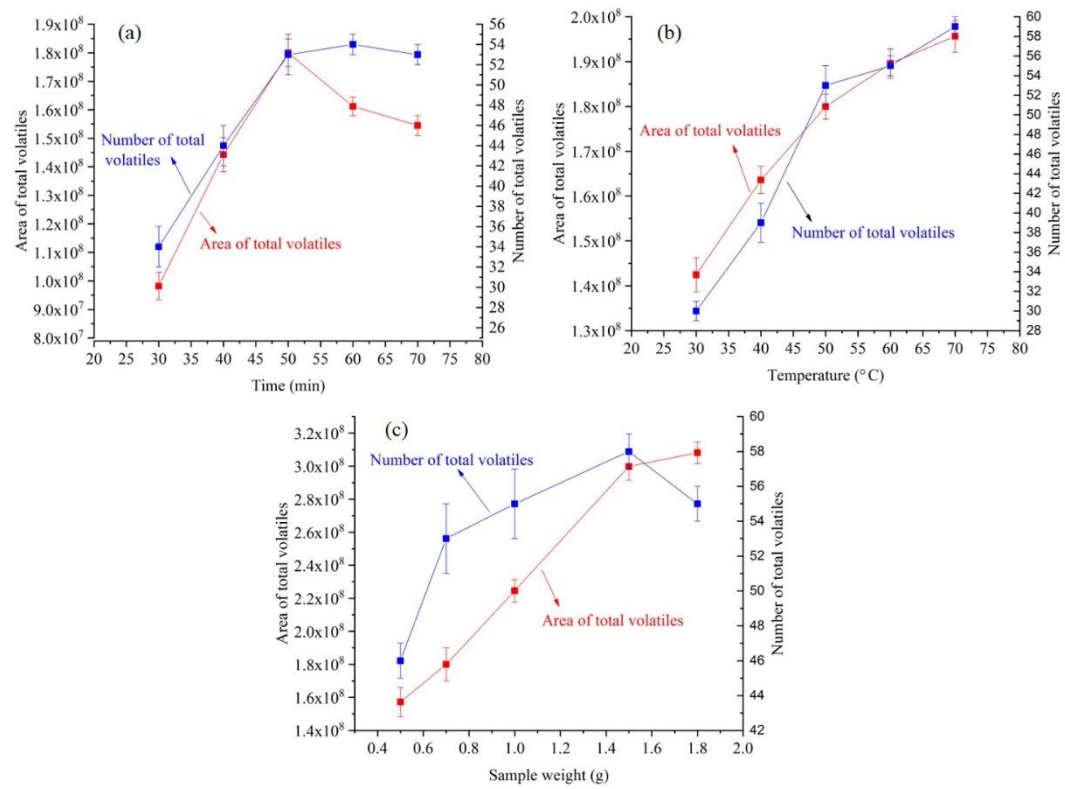

Supplement: Supplementary file 1 [file 21754560]
